# Supplementary material
Source: publisher figshare collection journal article supplement (https://acs.figshare.com/ndownloader/files/4427044)
Supplement: Supplementary file 1 [file 4427044]

## Supporting Information for:

# Naphthalimide Phosphorescence Finally Exposed in a Platinum(II) Diimine Complex

Huimin Guo,<sup>a</sup> Maria L. Muro-Small,<sup>b</sup> Shaomin Ji,<sup>a</sup> Jianzhang Zhao,<sup>a\*</sup> and Felix N. Castellano<sup>b\*</sup>

<sup>a</sup>State Key Laboratory of Fine Chemicals, School of Chemical Engineering, Dalian University of Technology, 158 Zhongshan Road, Dalian 116012, P. R. China.

<sup>b</sup>Department of Chemistry & Center for Photochemical Sciences, Bowling Green State University, Bowling Green, Ohio 43403, USA.

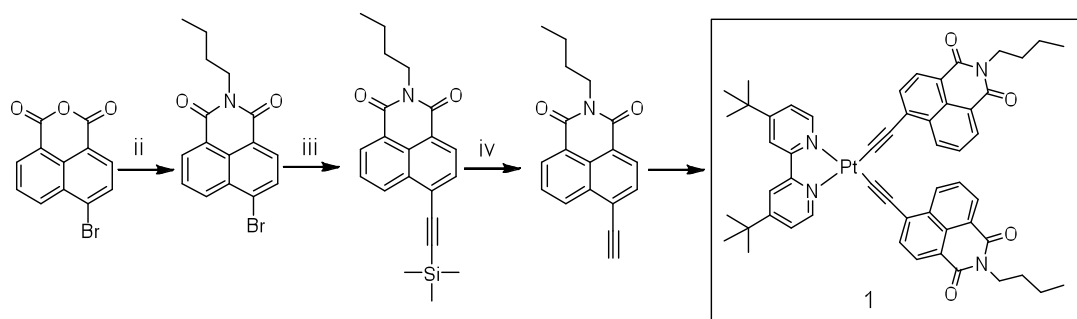

**Synthesis of *N*-butyl-4-ethynynaphthalimide (NI-C≡C-H).** 4-Bromonaphthalene anhydride (4.00 g, 14 mmol) and *N*-butylamine (1.28 g, 1.2 equiv.) was heated in ethanol (300 mL) at 60 °C. Then solution was cooled to room temperature. The light yellow precipitate was collected and washed with water. The product (*N*-butyl-4-bromonaphthalimide) was obtained. <sup>1</sup>H NMR (400 MHz, CDCl<sub>3</sub>) 8.66 (d, 1H, *J* = 4.0 Hz), 8.56 (d, 1H, *J* = 8.4 Hz), 8.41 (d, 1H, *J* = 6.4 Hz), 8.04 (d, 1H, *J* = 8.4 Hz), 7.86 (t, 2H,

$J = 8.4$  Hz), 4.17 (t, 2H,  $J = 8.4$  Hz), 1.75–1.68 (m, 2H), 1.50–1.40 (m, 2H), 0.98 (t, 3H,  $J = 8.4$  Hz).  $^{13}\text{C}$  NMR (100 MHz,  $\text{CDCl}_3$ )  $\delta$ : 163.57, 163.54, 133.14, 131.99, 131.17, 131.10, 130.52, 130.18, 128.89, 128.10, 123.12, 122.26, 40.48, 30.26, 20.50, 13.98. TOF-MS:  $\text{C}_{16}\text{H}_{14}\text{BrNO}_2$ , Calculated,  $m/z = 331.0208$ , found  $m/z = 331.0211$ .

Under an Ar atmosphere, *N*-butyl-4-bromonaphthalimide (1.00 g, 3.0 mmol),  $\text{Pd}(\text{PPh}_3)_2\text{Cl}_2$  (42.0 mg, 0.06 mmol),  $\text{PPh}_3$  (32.0 mg, 0.12 mmol) and  $\text{CuI}$  (23.0 mg, 0.12 mmol) were mixed in THF (10 mL) and triethylamine (10 mL). Then trimethylsilylacetylene (414 mg, 4.2 mmol) was added. The mixture was heated for 6 h under an Ar atmosphere. The reaction mixture was cooled to room temperature, the solvent was removed under reduced pressure, and then was purified with the column chromatography (silica gel, DCM: ethyl acetate = 10:1, V/V). The third fraction was collected. Then the silyl group was removed by treatment with anhydrous potassium carbonate in methanol at room temperature. The residue was taken up with dichloromethane, washed with water (2×10 mL). The combined organic layer was dried over anhydrous  $\text{Na}_2\text{SO}_4$ . The solvent was removed under reduced pressure and the residue was purified with column chromatography (silica gel, DCM : ethyl acetate = 10:1, V/V), yellow powder was obtained, 600.0 mg, 56.0 %.  $^1\text{H}$  NMR (400 MHz,  $\text{CDCl}_3$ ):  $\delta$  8.59 (m, 2H), 8.48 (d,  $J = 7.6$  Hz, 1H), 7.89 (d,  $J = 7.6$  Hz, 1H), 7.78 (t,  $J = 8.2$  Hz, 1H), 4.15(t,  $J = 7.6$  Hz, 2H), 3.74 (s, 1H), 1.50 (m, 2H), 1.46 (m, 2H), 0.97 (m, 3H).  $^{13}\text{C}$ NMR (100 MHz,  $\text{CDCl}_3$ ): 164.09, 163.82, 132.32, 132.10, 131.82, 130.29, 128.05, 127.85, 126.31, 123.16, 123.00, 86.64, 80.49, 40.53, 30.36, 20.56, 14.04. TOF-MS:  $\text{C}_{18}\text{H}_{15}\text{NO}_2$ , Calculated,  $m/z = 277.1111$ , found,  $m/z = 277.1103$ .

**Synthesis of Title Complex 1.** Pt(dbbpy)Cl<sub>2</sub> (50 mg, 0.09 mmol), CuI (5 mg, 0.09 mmol) and diisopropylamine (1.0 mL) were dissolved in CH<sub>2</sub>Cl<sub>2</sub> (5 mL), the mixture was stirred for 10 min. The mixture was purged with Ar, then NI-C≡C-H (100 mg, 0.36 mmol) was added and the mixture was stirred at room temperature for 24 h. The mixture was evaporated to dryness, the residue was purified by column chromatography (silica gel, CH<sub>2</sub>Cl<sub>2</sub>: CH<sub>3</sub>OH = 150:1, v/v). The product was collected as the third fraction. 82.0 mg of yellow powder was obtained, yield: 86.0 %. <sup>1</sup>H NMR (400 MHz, CDCl<sub>3</sub>): δ 9.68 (d, *J* = 6.0 Hz, 2H), 9.14 (d, *J* = 8.0 Hz, 2H), 8.51 (t, *J* = 7.6 Hz, 4H), 8.05 (s, 2H), 7.88 (d, *J* = 7.6 Hz, 2H), 7.68 (d, *J* = 5.2 Hz, 2H), 7.48 (t, *J* = 8.0 Hz, 2H), 4.16 (t, *J* = 7.6 Hz, 4H), 1.71 (m, 4H), 1.48 (m, 24H), 0.96 (t, *J* = 7.6 Hz, 4H). <sup>13</sup>C NMR (100 MHz, CDCl<sub>3</sub>): δ 164.63, 164.43, 156.40, 151.45, 134.26, 33.26, 133.15, 131.24, 130.99, 130.10, 128.52, 126.64, 125.19, 122.90, 119.60, 119.26, 101.55, 100.12, 40.34, 36.16, 30.44, 20.61, 14.03. HR-MALDI-MS: C<sub>54</sub>H<sub>56</sub>NaN<sub>4</sub>Pt, Calculated *m/z* = 1038.3534, found, *m/z* = 1038.3608.

**Photophysical Measurements.** Static UV-Vis absorption spectra were measured with a Varian 50 Bio spectrophotometer or a Hewlett-Packard 8453 diode array spectrophotometer. Uncorrected steady-state luminescence spectra were obtained by a PTI Instruments spectrofluorimeter equipped with an R-928 PMT using single photon counting detection. This fluorimeter operates under the control of Felix32 software from PTI. All photophysical measurements were conducted at ambient temperature, 22 ± 2 °C with the exception of low temperature glasses maintained at 77 K in a

liquid N<sub>2</sub> bath inside a quartz-tipped finger dewar. All luminescence samples were prepared with spectroscopic grade MTHF in 1 cm<sup>2</sup> anaerobic quartz cells (Starna Cells), degassed by solvent-saturated high purity argon for at least 35 minutes prior to the measurements and maintained under argon atmosphere throughout the experiments. Transient absorption spectra were collected on a Proteus Nanosecond Transient Absorption spectrometer (Ultrafast Systems) equipped with a 150 W Xe-arc lamp (Newport), a Bruker Optics monochromator and photodiode detectors (DET 10A and DET 10C, Thorlabs). Excitation at 420 nm (2 mJ/pulse) from a computer-controlled Nd:YAG laser/OPO system from Opotek (Vibrant LD 355 II) operating at 10 Hz was directed to the sample with an optical absorbance of 0.4 at the excitation wavelength. The data consisting of a 128-shot average were analyzed by Origin 8.0 software.
